# Supplementary material for: Impact of ferulic and vanillic acids on soluble and insoluble dietary fiber utilization from maize bran by the human gut microbiota
Source: Royal Society of Chemistry journal article supplement (doi:10.1039/d5fo00005j), 2025-01-01
Supplement: d5fo00005j1.xlsx [file d5fo00005j1.xlsx]

## Sheet: Sheet1
Table S1. Maize bran nutrition information provided by the company (High fiber fine bran #88011-00, Cargill, Wayzata, MN, USA).
Nutrient	Unit	Amount
Total Fat	g/100g	1.3
Sodium	mg/100g	6
Total Carbohydrate	g/100g	84.1
Dietary fiber	g/100g	74.4
Total sugars	g/100g	0.4
Protein	g/100g	4.6
Calcium	mg/100g	10.1
Iron	mg/100g	1.5
Potassium	mg/100g	90
Thiamin	mg/100g	0.1
Riboflavin	mg/100g	0.1
Niacin	mg(NE)/100g	1.9
Phosphorus	mg/100g	64.7
Moisture	g/100g	9.2
Ash	g/100g	0.8
