# Supplementary material for: Impact of ferulic and vanillic acids on soluble and insoluble dietary fiber utilization from maize bran by the human gut microbiota
Source: Royal Society of Chemistry journal article supplement (doi:10.1039/d5fo00005j), 2025-01-01
Supplement: d5fo00005j2.xlsx [file d5fo00005j2.xlsx]

## Sheet: PC_SCFA_Supplementary table 2
Table S2. Mean concentrations of short/branched chain fatty acids (B/SCFA) produced after 24 h of fermentation of soluble and insoluble maize bran fiber with ferulic and vanillic acids at different concentrations (n=3).
B/SCFA	Fiber	Phenolic compound (PC)	PC concentration (mg/g)	Units	Mean	SD	Tukey's HSD group
Acetate	Insoluble	Ferulic	0	mM	24.9263	1.3051	a
Acetate	Insoluble	Ferulic	0.3	mM	24.3801	0.79502	a
Acetate	Insoluble	Ferulic	3	mM	23.4659	1.39517	a
Acetate	Insoluble	Ferulic	30	mM	25.5903	0.278148	a
Acetate	Insoluble	Vanillic	0	mM	24.9263	1.3051	a
Acetate	Insoluble	Vanillic	0.3	mM	25.0352	0.901995	a
Acetate	Insoluble	Vanillic	3	mM	25.0113	3.05569	a
Acetate	Insoluble	Vanillic	30	mM	26.2297	3.66136	a
Acetate	Soluble	Ferulic	0	mM	27.1394	0.317152	a
Acetate	Soluble	Ferulic	0.3	mM	28.2722	0.846958	a
Acetate	Soluble	Ferulic	3	mM	26.8809	0.289888	a
Acetate	Soluble	Ferulic	30	mM	28.8513	1.82075	a
Acetate	Soluble	Vanillic	0	mM	27.1394	0.317152	a
Acetate	Soluble	Vanillic	0.3	mM	26.6176	1.12553	a
Acetate	Soluble	Vanillic	3	mM	27.9255	1.09531	a
Acetate	Soluble	Vanillic	30	mM	29.0253	1.15386	a
BCFA	Insoluble	Ferulic	0	mM	0.435031	0.0559846	a
BCFA	Insoluble	Ferulic	0.3	mM	0.691182	0.148603	a
BCFA	Insoluble	Ferulic	3	mM	0.502024	0.0860019	a
BCFA	Insoluble	Ferulic	30	mM	0.632965	0.134616	a
BCFA	Insoluble	Vanillic	0	mM	0.435031	0.0559846	b
BCFA	Insoluble	Vanillic	0.3	mM	0.566174	0.186254	ab
BCFA	Insoluble	Vanillic	3	mM	0.75963	0.0315073	ab
BCFA	Insoluble	Vanillic	30	mM	1.0913	0.508767	a
BCFA	Soluble	Ferulic	0	mM	0.307151	0.00523621	a
BCFA	Soluble	Ferulic	0.3	mM	0.253272	0.020364	b
BCFA	Soluble	Ferulic	3	mM	0.250725	0.0166761	b
BCFA	Soluble	Ferulic	30	mM	0.269034	0.0116358	ab
BCFA	Soluble	Vanillic	0	mM	0.307151	0.00523621	a
BCFA	Soluble	Vanillic	0.3	mM	0.268384	0.0142263	ab
BCFA	Soluble	Vanillic	3	mM	0.247645	0.0223715	b
BCFA	Soluble	Vanillic	30	mM	0.296238	0.0149669	a
Butyrate	Insoluble	Ferulic	0	mM	2.30391	0.555158	a
Butyrate	Insoluble	Ferulic	0.3	mM	3.32059	0.651349	a
Butyrate	Insoluble	Ferulic	3	mM	3.30857	1.0254	a
Butyrate	Insoluble	Ferulic	30	mM	2.94141	0.196991	a
Butyrate	Insoluble	Vanillic	0	mM	2.30391	0.555158	a
Butyrate	Insoluble	Vanillic	0.3	mM	2.65095	0.628912	a
Butyrate	Insoluble	Vanillic	3	mM	3.83317	1.04882	a
Butyrate	Insoluble	Vanillic	30	mM	4.79172	1.99096	a
Butyrate	Soluble	Ferulic	0	mM	5.44336	0.561428	b
Butyrate	Soluble	Ferulic	0.3	mM	6.90031	0.811983	a
Butyrate	Soluble	Ferulic	3	mM	6.47004	0.291213	ab
Butyrate	Soluble	Ferulic	30	mM	7.69848	0.406317	a
Butyrate	Soluble	Vanillic	0	mM	5.44336	0.561428	b
Butyrate	Soluble	Vanillic	0.3	mM	7.05831	0.0873303	a
Butyrate	Soluble	Vanillic	3	mM	6.12702	0.656043	ab
Butyrate	Soluble	Vanillic	30	mM	7.16158	0.856047	a
Isobutyrate	Insoluble	Ferulic	0	mM	0.0951351	0.0227912	a
Isobutyrate	Insoluble	Ferulic	0.3	mM	0.158429	0.0438909	a
Isobutyrate	Insoluble	Ferulic	3	mM	0.100585	0.0304718	a
Isobutyrate	Insoluble	Ferulic	30	mM	0.135425	0.0279914	a
Isobutyrate	Insoluble	Vanillic	0	mM	0.0951351	0.0227912	a
Isobutyrate	Insoluble	Vanillic	0.3	mM	0.120101	0.0490001	a
Isobutyrate	Insoluble	Vanillic	3	mM	0.178477	0.0111695	a
Isobutyrate	Insoluble	Vanillic	30	mM	0.297919	0.213119	a
Isobutyrate	Soluble	Ferulic	0	mM	0.0632129	0.00496324	a
Isobutyrate	Soluble	Ferulic	0.3	mM	0.051014	0.00462527	ab
Isobutyrate	Soluble	Ferulic	3	mM	0.0447115	0.00276314	b
Isobutyrate	Soluble	Ferulic	30	mM	0.0538585	0.00727396	ab
Isobutyrate	Soluble	Vanillic	0	mM	0.0632129	0.00496324	a
Isobutyrate	Soluble	Vanillic	0.3	mM	0.051695	0.00103381	a
Isobutyrate	Soluble	Vanillic	3	mM	0.0562532	0.0162367	a
Isobutyrate	Soluble	Vanillic	30	mM	0.0588551	0.00392636	a
Isovalerate	Insoluble	Ferulic	0	mM	0.339896	0.0332386	a
Isovalerate	Insoluble	Ferulic	0.3	mM	0.532753	0.105173	a
Isovalerate	Insoluble	Ferulic	3	mM	0.401438	0.0557854	a
Isovalerate	Insoluble	Ferulic	30	mM	0.49754	0.10676	a
Isovalerate	Insoluble	Vanillic	0	mM	0.339896	0.0332386	b
Isovalerate	Insoluble	Vanillic	0.3	mM	0.446073	0.137396	ab
Isovalerate	Insoluble	Vanillic	3	mM	0.581153	0.0204432	ab
Isovalerate	Insoluble	Vanillic	30	mM	0.793382	0.295648	a
Isovalerate	Soluble	Ferulic	0	mM	0.243938	0.010079	a
Isovalerate	Soluble	Ferulic	0.3	mM	0.202258	0.0183668	b
Isovalerate	Soluble	Ferulic	3	mM	0.206014	0.0139161	b
Isovalerate	Soluble	Ferulic	30	mM	0.215175	0.00481707	ab
Isovalerate	Soluble	Vanillic	0	mM	0.243938	0.010079	a
Isovalerate	Soluble	Vanillic	0.3	mM	0.216689	0.0142164	ab
Isovalerate	Soluble	Vanillic	3	mM	0.191392	0.00715614	b
Isovalerate	Soluble	Vanillic	30	mM	0.237383	0.0110491	a
Propionate	Insoluble	Ferulic	0	mM	4.31282	0.481592	a
Propionate	Insoluble	Ferulic	0.3	mM	4.70132	0.154862	a
Propionate	Insoluble	Ferulic	3	mM	4.61899	0.19232	a
Propionate	Insoluble	Ferulic	30	mM	4.9153	0.10407	a
Propionate	Insoluble	Vanillic	0	mM	4.31282	0.481592	a
Propionate	Insoluble	Vanillic	0.3	mM	4.57168	0.365904	a
Propionate	Insoluble	Vanillic	3	mM	4.77534	0.22761	a
Propionate	Insoluble	Vanillic	30	mM	4.96891	0.489284	a
Propionate	Soluble	Ferulic	0	mM	4.74806	0.453322	b
Propionate	Soluble	Ferulic	0.3	mM	6.05537	0.566548	a
Propionate	Soluble	Ferulic	3	mM	5.00003	0.259805	ab
Propionate	Soluble	Ferulic	30	mM	6.03577	0.368656	a
Propionate	Soluble	Vanillic	0	mM	4.74806	0.453322	b
Propionate	Soluble	Vanillic	0.3	mM	5.66654	0.276775	a
Propionate	Soluble	Vanillic	3	mM	5.38699	0.235601	ab
Propionate	Soluble	Vanillic	30	mM	5.58521	0.355245	ab
SCFA	Insoluble	Ferulic	0	mM	31.543	1.91221	a
SCFA	Insoluble	Ferulic	0.3	mM	32.402	0.0721244	a
SCFA	Insoluble	Ferulic	3	mM	31.3935	0.522115	a
SCFA	Insoluble	Ferulic	30	mM	33.447	0.383103	a
SCFA	Insoluble	Vanillic	0	mM	31.543	1.91221	a
SCFA	Insoluble	Vanillic	0.3	mM	32.2578	1.45887	a
SCFA	Insoluble	Vanillic	3	mM	33.6198	2.29588	a
SCFA	Insoluble	Vanillic	30	mM	35.9904	5.78494	a
SCFA	Soluble	Ferulic	0	mM	37.3309	0.958515	c
SCFA	Soluble	Ferulic	0.3	mM	41.2278	1.20373	ab
SCFA	Soluble	Ferulic	3	mM	38.351	0.57466	bc
SCFA	Soluble	Ferulic	30	mM	42.5856	2.1916	a
SCFA	Soluble	Vanillic	0	mM	37.3309	0.958515	b
SCFA	Soluble	Vanillic	0.3	mM	39.3425	1.16673	ab
SCFA	Soluble	Vanillic	3	mM	39.4395	1.7695	ab
SCFA	Soluble	Vanillic	30	mM	41.772	2.07975	a
