# Supplementary material for: Impact of ferulic and vanillic acids on soluble and insoluble dietary fiber utilization from maize bran by the human gut microbiota
Source: Royal Society of Chemistry journal article supplement (doi:10.1039/d5fo00005j), 2025-01-01
Supplement: d5fo00005j3.xlsx [file d5fo00005j3.xlsx]

## Sheet: Sheet1
Table S3. DESeq2 significant taxa across all taxonomic ranks for soluble and insoluble fiber
fiber_type	taxon_rank	taxon_name	group1*	group2	baseMean	log2FoldChange	lfcSE	stat	pvalue	padj	p.adj.signif
Soluble	Phylum	Actinobacteria	Ferulic.3	Control.0	301.131	-22.4177	3.27245	-6.85045	7.36167e-12	8.58862e-11	***
Soluble	Phylum	Actinobacteria	Ferulic.3	Ferulic.300	301.131	-24.4215	3.27078	-7.46656	8.23157e-14	1.23474e-12	***
Soluble	Phylum	Actinobacteria	Ferulic.3	Vanillic.3	301.131	-26.4619	3.2704	-8.09134	5.90128e-16	4.11796e-14	***
Soluble	Phylum	Actinobacteria	Ferulic.3	Vanillic.30	301.131	-25.4223	3.27053	-7.77314	7.65661e-15	1.60789e-13	***
Soluble	Phylum	Actinobacteria	Ferulic.3	Vanillic.300	301.131	-26.253	3.27042	-8.02743	9.95359e-16	4.11796e-14	***
Soluble	Phylum	Actinobacteria	Ferulic.30	Control.0	301.131	-22.1415	3.27245	-6.76605	1.32349e-11	1.38967e-10	***
Soluble	Phylum	Actinobacteria	Ferulic.30	Ferulic.300	301.131	-24.1453	3.27078	-7.38211	1.55794e-13	2.0448e-12	***
Soluble	Phylum	Actinobacteria	Ferulic.30	Vanillic.3	301.131	-26.1857	3.2704	-8.00688	1.17656e-15	4.11796e-14	***
Soluble	Phylum	Actinobacteria	Ferulic.30	Vanillic.30	301.131	-25.1461	3.27053	-7.68868	1.4866e-14	2.60154e-13	***
Soluble	Phylum	Actinobacteria	Ferulic.30	Vanillic.300	301.131	-25.9768	3.27042	-7.94297	1.97395e-15	5.18161e-14	***
Soluble	Phylum	Bacteroidetes	Ferulic.30	Vanillic.3	4491.18	0.682924	0.239506	2.85139	0.00435293	0.0304705	*
Soluble	Phylum	Bacteroidetes	Ferulic.30	Vanillic.30	4491.18	0.704668	0.239516	2.94205	0.00326043	0.0244532	*
Soluble	Phylum	Bacteroidetes	Ferulic.300	Control.0	4491.18	0.783255	0.239511	3.27023	0.00107459	0.0086794	**
Soluble	Phylum	Bacteroidetes	Ferulic.300	Vanillic.3	4491.18	0.867067	0.239494	3.6204	0.000294145	0.00257376	**
Soluble	Phylum	Bacteroidetes	Ferulic.300	Vanillic.30	4491.18	0.88881	0.239504	3.71105	0.000206404	0.00197022	**
Soluble	Class	Actinobacteria	Ferulic.3	Ferulic.300	200.714	-23.2622	3.90582	-5.9558	2.58811e-09	6.11441e-08	***
Soluble	Class	Actinobacteria	Ferulic.3	Vanillic.3	200.714	-25.7037	3.90519	-6.58194	4.64353e-11	4.38814e-09	***
Soluble	Class	Actinobacteria	Ferulic.3	Vanillic.30	200.714	-24.6083	3.90535	-6.30118	2.95396e-10	9.30498e-09	***
Soluble	Class	Actinobacteria	Ferulic.3	Vanillic.300	200.714	-25.1711	3.90525	-6.44546	1.15249e-10	5.44554e-09	***
Soluble	Class	Actinobacteria	Ferulic.30	Control.0	200.714	-22.2364	3.90684	-5.69165	1.2582e-08	2.64223e-07	***
Soluble	Class	Actinobacteria	Ferulic.30	Ferulic.300	200.714	-23.4078	3.90582	-5.99306	2.05926e-09	5.55999e-08	***
Soluble	Class	Actinobacteria	Ferulic.30	Vanillic.3	200.714	-25.8493	3.90519	-6.61921	3.61118e-11	4.38814e-09	***
Soluble	Class	Actinobacteria	Ferulic.30	Vanillic.30	200.714	-24.7539	3.90535	-6.33845	2.32092e-10	8.77306e-09	***
Soluble	Class	Actinobacteria	Ferulic.30	Vanillic.300	200.714	-25.3167	3.90525	-6.48273	9.00752e-11	5.44554e-09	***
Soluble	Class	Bacilli	Vanillic.3	Control.0	59.9644	-2.7146	0.643852	-4.21619	2.48463e-05	0.000426905	***
Soluble	Class	Bacilli	Vanillic.30	Control.0	59.9644	-2.37836	0.639467	-3.71929	0.000199787	0.0030008	**
Soluble	Class	Bacteroidia	Ferulic.30	Vanillic.3	4491.18	0.682924	0.239506	2.85139	0.00435293	0.0373956	*
Soluble	Class	Bacteroidia	Ferulic.30	Vanillic.30	4491.18	0.704668	0.239516	2.94205	0.00326043	0.0293439	*
Soluble	Class	Bacteroidia	Ferulic.300	Control.0	4491.18	0.783255	0.239511	3.27023	0.00107459	0.0126936	*
Soluble	Class	Bacteroidia	Ferulic.300	Vanillic.3	4491.18	0.867067	0.239494	3.6204	0.000294145	0.00370622	**
Soluble	Class	Bacteroidia	Ferulic.300	Vanillic.30	4491.18	0.88881	0.239504	3.71105	0.000206404	0.0030008	**
Soluble	Class	Deltaproteobacteria	Ferulic.30	Vanillic.3	7.5954	-7.20334	2.59758	-2.77309	0.0055526	0.0456279	*
Soluble	Class	Erysipelotrichia	Ferulic.30	Control.0	230.344	-4.51242	1.41688	-3.18477	0.0014487	0.0161061	*
Soluble	Class	Erysipelotrichia	Ferulic.30	Vanillic.3	230.344	-5.19481	1.41656	-3.66722	0.000245207	0.00331029	**
Soluble	Class	Erysipelotrichia	Ferulic.30	Vanillic.30	230.344	-4.45061	1.41685	-3.1412	0.00168255	0.0172008	*
Soluble	Class	Erysipelotrichia	Ferulic.30	Vanillic.300	230.344	-4.21065	1.41697	-2.97159	0.00296259	0.0279965	*
Soluble	Order	Bacteroidales	Ferulic.30	Vanillic.30	4489.54	0.70572	0.239333	2.94869	0.00319119	0.0404035	*
Soluble	Order	Bacteroidales	Ferulic.300	Control.0	4489.54	0.78345	0.239328	3.27354	0.0010621	0.017056	*
Soluble	Order	Bacteroidales	Ferulic.300	Vanillic.3	4489.54	0.867628	0.239312	3.62551	0.000288393	0.00492071	**
Soluble	Order	Bacteroidales	Ferulic.300	Vanillic.30	4489.54	0.889497	0.239321	3.71675	0.000201805	0.00423791	**
Soluble	Order	Bifidobacteriales	Ferulic.3	Control.0	200.714	-22.0908	3.90684	-5.65439	1.56402e-08	4.26978e-07	***
Soluble	Order	Bifidobacteriales	Ferulic.3	Ferulic.300	200.714	-23.2622	3.90582	-5.9558	2.58811e-09	8.83192e-08	***
Soluble	Order	Bifidobacteriales	Ferulic.3	Vanillic.3	200.714	-25.7037	3.90519	-6.58194	4.64353e-11	6.33842e-09	***
Soluble	Order	Bifidobacteriales	Ferulic.3	Vanillic.30	200.714	-24.6083	3.90535	-6.30118	2.95396e-10	1.34405e-08	***
Soluble	Order	Bifidobacteriales	Ferulic.3	Vanillic.300	200.714	-25.1711	3.90525	-6.44546	1.15249e-10	7.86578e-09	***
Soluble	Order	Bifidobacteriales	Ferulic.30	Control.0	200.714	-22.2364	3.90684	-5.69165	1.2582e-08	3.81655e-07	***
Soluble	Order	Bifidobacteriales	Ferulic.30	Ferulic.300	200.714	-23.4078	3.90582	-5.99306	2.05926e-09	8.0311e-08	***
Soluble	Order	Bifidobacteriales	Ferulic.30	Vanillic.3	200.714	-25.8493	3.90519	-6.61921	3.61118e-11	6.33842e-09	***
Soluble	Order	Bifidobacteriales	Ferulic.30	Vanillic.30	200.714	-24.7539	3.90535	-6.33845	2.32092e-10	1.26722e-08	***
Soluble	Order	Bifidobacteriales	Ferulic.30	Vanillic.300	200.714	-25.3167	3.90525	-6.48273	9.00752e-11	7.86578e-09	***
Soluble	Order	Erysipelotrichales	Ferulic.30	Control.0	230.344	-4.51242	1.41688	-3.18477	0.0014487	0.0219719	*
Soluble	Order	Erysipelotrichales	Ferulic.30	Vanillic.3	230.344	-5.19481	1.41656	-3.66722	0.000245207	0.00446276	**
Soluble	Order	Erysipelotrichales	Ferulic.30	Vanillic.30	230.344	-4.45061	1.41685	-3.1412	0.00168255	0.0241756	*
Soluble	Order	Erysipelotrichales	Ferulic.30	Vanillic.300	230.344	-4.21065	1.41697	-2.97159	0.00296259	0.0404035	*
Soluble	Order	Lactobacillales	Ferulic.3	Control.0	56.4225	-2.47056	0.648593	-3.80911	0.000139469	0.00317292	**
Soluble	Order	Lactobacillales	Ferulic.300	Control.0	56.4225	-1.88663	0.641169	-2.94248	0.00325596	0.0404035	*
Soluble	Order	Lactobacillales	Vanillic.3	Control.0	56.4225	-2.8105	0.652041	-4.31032	1.63022e-05	0.000404592	***
Soluble	Order	Lactobacillales	Vanillic.30	Control.0	56.4225	-2.37837	0.646222	-3.68042	0.000232849	0.00446276	**
Soluble	Family	Bacteroidaceae	Ferulic.300	Control.0	4059.52	0.795179	0.266902	2.97929	0.00288915	0.0388302	*
Soluble	Family	Bacteroidaceae	Ferulic.300	Vanillic.3	4059.52	0.919907	0.266897	3.44667	0.000567534	0.0103076	*
Soluble	Family	Bacteroidaceae	Ferulic.300	Vanillic.30	4059.52	0.924135	0.266902	3.46246	0.00053527	0.0102265	*
Soluble	Family	Barnesiellaceae	Ferulic.30	Control.0	4.67832	-5.48978	1.88928	-2.90574	0.00366381	0.0447651	*
Soluble	Family	Barnesiellaceae	Ferulic.30	Vanillic.3	4.67832	-6.0094	1.87955	-3.19726	0.0013874	0.0216822	*
Soluble	Family	Barnesiellaceae	Ferulic.30	Vanillic.300	4.67832	-5.79431	1.88217	-3.07852	0.00208032	0.0296734	*
Soluble	Family	Barnesiellaceae	Ferulic.300	Vanillic.3	4.67832	-5.89248	1.87955	-3.13505	0.00171824	0.0251012	*
Soluble	Family	Barnesiellaceae	Ferulic.300	Vanillic.300	4.67832	-5.67739	1.88217	-3.0164	0.00255797	0.0350807	*
Soluble	Family	Bifidobacteriaceae	Ferulic.3	Control.0	200.714	-22.0908	3.90684	-5.65439	1.56402e-08	5.25511e-07	***
Soluble	Family	Bifidobacteriaceae	Ferulic.3	Ferulic.300	200.714	-23.2622	3.90582	-5.9558	2.58811e-09	1.08701e-07	***
Soluble	Family	Bifidobacteriaceae	Ferulic.3	Vanillic.3	200.714	-25.7037	3.90519	-6.58194	4.64353e-11	3.12045e-09	***
Soluble	Family	Bifidobacteriaceae	Ferulic.3	Vanillic.30	200.714	-24.6083	3.90535	-6.30118	2.95396e-10	1.4179e-08	***
Soluble	Family	Bifidobacteriaceae	Ferulic.3	Vanillic.300	200.714	-25.1711	3.90525	-6.44546	1.15249e-10	6.45397e-09	***
Soluble	Family	Bifidobacteriaceae	Ferulic.30	Control.0	200.714	-22.2364	3.90684	-5.69165	1.2582e-08	4.45006e-07	***
Soluble	Family	Bifidobacteriaceae	Ferulic.30	Ferulic.300	200.714	-23.4078	3.90582	-5.99306	2.05926e-09	9.22547e-08	***
Soluble	Family	Bifidobacteriaceae	Ferulic.30	Vanillic.3	200.714	-25.8493	3.90519	-6.61921	3.61118e-11	2.69635e-09	***
Soluble	Family	Bifidobacteriaceae	Ferulic.30	Vanillic.30	200.714	-24.7539	3.90535	-6.33845	2.32092e-10	1.19973e-08	***
Soluble	Family	Bifidobacteriaceae	Ferulic.30	Vanillic.300	200.714	-25.3167	3.90525	-6.48273	9.00752e-11	5.50277e-09	***
Soluble	Family	Christensenellaceae	Ferulic.3	Ferulic.30	28.817	5.77355	1.76138	3.27785	0.00104599	0.0175727	*
Soluble	Family	Christensenellaceae	Ferulic.30	Control.0	28.817	-7.47326	1.74578	-4.28076	1.86253e-05	0.000481391	***
Soluble	Family	Christensenellaceae	Ferulic.30	Ferulic.300	28.817	-7.05821	1.74735	-4.03939	5.35903e-05	0.0013338	**
Soluble	Family	Christensenellaceae	Ferulic.30	Vanillic.3	28.817	-8.26827	1.74232	-4.74554	2.07947e-06	5.82253e-05	***
Soluble	Family	Christensenellaceae	Ferulic.30	Vanillic.30	28.817	-8.16939	1.74263	-4.68797	2.75921e-06	7.41677e-05	***
Soluble	Family	Christensenellaceae	Ferulic.30	Vanillic.300	28.817	-8.35309	1.7421	-4.79486	1.62792e-06	4.75636e-05	***
Soluble	Family	Eggerthellaceae	Ferulic.3	Ferulic.300	85.4423	-35.1787	3.7377	-9.41188	4.87354e-21	4.09377e-19	***
Soluble	Family	Eggerthellaceae	Ferulic.3	Vanillic.3	85.4423	-36.4807	3.73702	-9.76196	1.63955e-22	2.75444e-20	***
Soluble	Family	Eggerthellaceae	Ferulic.3	Vanillic.30	85.4423	-35.5892	3.73742	-9.5224	1.69221e-21	1.62452e-19	***
Soluble	Family	Eggerthellaceae	Ferulic.3	Vanillic.300	85.4423	-36.8009	3.73693	-9.84789	6.99959e-23	1.56791e-20	***
Soluble	Family	Eggerthellaceae	Ferulic.30	Ferulic.300	85.4423	-35.7003	3.7377	-9.55141	1.27947e-21	1.433e-19	***
Soluble	Family	Eggerthellaceae	Ferulic.30	Vanillic.3	85.4423	-37.0022	3.73702	-9.90151	4.10015e-23	1.37765e-20	***
Soluble	Family	Eggerthellaceae	Ferulic.30	Vanillic.30	85.4423	-36.1107	3.73742	-9.66194	4.37487e-22	5.87983e-20	***
Soluble	Family	Eggerthellaceae	Ferulic.30	Vanillic.300	85.4423	-37.3224	3.73693	-9.98745	1.72972e-23	1.16237e-20	***
Soluble	Family	Eggerthellaceae	Ferulic.300	Control.0	85.4423	20.2452	3.73758	5.41666	6.0722e-08	1.85478e-06	***
Soluble	Family	Eggerthellaceae	Vanillic.3	Control.0	85.4423	21.5471	3.7369	5.76604	8.11577e-09	3.02989e-07	***
Soluble	Family	Eggerthellaceae	Vanillic.30	Control.0	85.4423	20.6556	3.7373	5.52689	3.25949e-08	1.04304e-06	***
Soluble	Family	Eggerthellaceae	Vanillic.300	Control.0	85.4423	21.8673	3.73681	5.85187	4.86066e-09	1.92139e-07	***
Soluble	Family	Erysipelotrichaceae	Ferulic.30	Control.0	230.344	-4.51242	1.41688	-3.18477	0.0014487	0.0221255	*
Soluble	Family	Erysipelotrichaceae	Ferulic.30	Vanillic.3	230.344	-5.19481	1.41656	-3.66722	0.000245207	0.0053264	**
Soluble	Family	Erysipelotrichaceae	Ferulic.30	Vanillic.30	230.344	-4.45061	1.41685	-3.1412	0.00168255	0.0251012	*
Soluble	Family	Erysipelotrichaceae	Ferulic.30	Vanillic.300	230.344	-4.21065	1.41697	-2.97159	0.00296259	0.0390365	*
Soluble	Family	Marinifilaceae	Ferulic.3	Vanillic.300	19.8043	-1.88486	0.57909	-3.25486	0.00113447	0.0185943	*
Soluble	Family	Peptostreptococcaceae	Ferulic.3	Control.0	112.386	-7.02622	1.74877	-4.0178	5.87431e-05	0.00140983	**
Soluble	Family	Peptostreptococcaceae	Ferulic.3	Ferulic.30	112.386	-6.20273	1.74905	-3.54634	0.000390618	0.00795439	**
Soluble	Family	Peptostreptococcaceae	Ferulic.3	Vanillic.3	112.386	-5.09389	1.75011	-2.91062	0.00360716	0.0447651	*
Soluble	Family	Peptostreptococcaceae	Ferulic.300	Control.0	112.386	-5.50436	1.70185	-3.23434	0.00121922	0.0195076	*
Soluble	Family	Rikenellaceae	Ferulic.3	Vanillic.3	110.208	-2.18097	0.631031	-3.4562	0.000547847	0.0102265	*
Soluble	Family	Rikenellaceae	Ferulic.3	Vanillic.300	110.208	-2.21123	0.630964	-3.50452	0.000457429	0.00904095	**
Soluble	Family	Rikenellaceae	Ferulic.300	Control.0	110.208	1.86048	0.633455	2.93703	0.00331369	0.042823	*
Soluble	Family	Rikenellaceae	Vanillic.3	Control.0	110.208	2.28854	0.632463	3.61846	0.00029636	0.00622356	**
Soluble	Family	Rikenellaceae	Vanillic.300	Control.0	110.208	2.3188	0.632396	3.66669	0.000245712	0.0053264	**
Soluble	Family	Ruminococcaceae	Ferulic.30	Vanillic.300	611.433	-2.80389	0.830242	-3.37719	0.000732294	0.01295	*
Soluble	Family	Streptococcaceae	Ferulic.3	Control.0	47.8796	-2.70055	0.8019	-3.36769	0.000757997	0.0130609	*
Soluble	Family	Streptococcaceae	Vanillic.3	Control.0	47.8796	-3.10601	0.806472	-3.85136	0.000117465	0.00272195	**
Soluble	Family	Streptococcaceae	Vanillic.30	Control.0	47.8796	-2.45126	0.79769	-3.07295	0.00211953	0.0296734	*
Soluble	Family	Tannerellaceae	Ferulic.300	Vanillic.3	223.838	1.11449	0.382416	2.91435	0.00356428	0.0447651	*
Soluble	Genus	Alistipes	Ferulic.3	Vanillic.3	110.208	-2.18097	0.631031	-3.4562	0.000547847	0.0193046	*
Soluble	Genus	Alistipes	Ferulic.3	Vanillic.300	110.208	-2.21123	0.630964	-3.50452	0.000457429	0.0166841	*
Soluble	Genus	Alistipes	Vanillic.3	Control.0	110.208	2.28854	0.632463	3.61846	0.00029636	0.0116251	*
Soluble	Genus	Alistipes	Vanillic.300	Control.0	110.208	2.3188	0.632396	3.66669	0.000245712	0.00999409	**
Soluble	Genus	Allisonella	Ferulic.3	Ferulic.30	25.7209	6.9904	1.86295	3.75234	0.000175194	0.00743324	**
Soluble	Genus	Allisonella	Ferulic.30	Control.0	25.7209	-7.99981	1.8584	-4.30467	1.67238e-05	0.000914966	***
Soluble	Genus	Allisonella	Ferulic.30	Vanillic.3	25.7209	-8.01557	1.85792	-4.31427	1.60131e-05	0.000899762	***
Soluble	Genus	Allisonella	Ferulic.30	Vanillic.30	25.7209	-8.04968	1.85786	-4.33277	1.47241e-05	0.000850319	***
Soluble	Genus	Allisonella	Ferulic.30	Vanillic.300	25.7209	-7.56315	1.85946	-4.0674	4.75409e-05	0.00235327	**
Soluble	Genus	Bacteroides	Ferulic.300	Vanillic.3	4059.52	0.919907	0.266897	3.44667	0.000567534	0.019665	*
Soluble	Genus	Bacteroides	Ferulic.300	Vanillic.30	4059.52	0.924135	0.266902	3.46246	0.00053527	0.0191867	*
Soluble	Genus	Barnesiella	Ferulic.30	Vanillic.3	4.67832	-6.0094	1.87955	-3.19726	0.0013874	0.0431374	*
Soluble	Genus	Bifidobacterium	Ferulic.3	Control.0	200.714	-22.0908	3.90684	-5.65439	1.56402e-08	1.2043e-06	***
Soluble	Genus	Bifidobacterium	Ferulic.3	Ferulic.300	200.714	-23.2622	3.90582	-5.9558	2.58811e-09	2.33943e-07	***
Soluble	Genus	Bifidobacterium	Ferulic.3	Vanillic.3	200.714	-25.7037	3.90519	-6.58194	4.64353e-11	6.03369e-09	***
Soluble	Genus	Bifidobacterium	Ferulic.3	Vanillic.30	200.714	-24.6083	3.90535	-6.30118	2.95396e-10	3.07064e-08	***
Soluble	Genus	Bifidobacterium	Ferulic.3	Vanillic.300	200.714	-25.1711	3.90525	-6.44546	1.15249e-10	1.33113e-08	***
Soluble	Genus	Bifidobacterium	Ferulic.30	Control.0	200.714	-22.2364	3.90684	-5.69165	1.2582e-08	1.00608e-06	***
Soluble	Genus	Bifidobacterium	Ferulic.30	Ferulic.300	200.714	-23.4078	3.90582	-5.99306	2.05926e-09	1.946e-07	***
Soluble	Genus	Bifidobacterium	Ferulic.30	Vanillic.3	200.714	-25.8493	3.90519	-6.61921	3.61118e-11	5.00509e-09	***
Soluble	Genus	Bifidobacterium	Ferulic.30	Vanillic.30	200.714	-24.7539	3.90535	-6.33845	2.32092e-10	2.53957e-08	***
Soluble	Genus	Bifidobacterium	Ferulic.30	Vanillic.300	200.714	-25.3167	3.90525	-6.48273	9.00752e-11	1.10157e-08	***
Soluble	Genus	Butyricicoccus	Ferulic.3	Ferulic.30	17.4479	6.91	2.0311	3.4021	0.000668712	0.0224234	*
Soluble	Genus	Butyricicoccus	Ferulic.30	Control.0	17.4479	-6.83806	2.03179	-3.36553	0.000763963	0.0248169	*
Soluble	Genus	Butyricicoccus	Ferulic.30	Vanillic.3	17.4479	-7.77839	2.0267	-3.83796	0.000124062	0.00537344	**
Soluble	Genus	Butyricicoccus	Ferulic.30	Vanillic.30	17.4479	-7.89641	2.02638	-3.89681	9.74693e-05	0.00437178	**
Soluble	Genus	Catenibacterium	Ferulic.3	Ferulic.30	184.252	22.332	2.02302	11.0389	2.47922e-28	8.59051e-26	***
Soluble	Genus	Catenibacterium	Ferulic.30	Control.0	184.252	-24.8253	2.02027	-12.2881	1.0497e-34	1.09116e-31	***
Soluble	Genus	Catenibacterium	Ferulic.30	Ferulic.300	184.252	-22.8801	2.02181	-11.3166	1.08552e-29	4.51361e-27	***
Soluble	Genus	Catenibacterium	Ferulic.30	Vanillic.3	184.252	-25.564	2.02001	-12.6554	1.04424e-36	2.17097e-33	***
Soluble	Genus	Catenibacterium	Ferulic.30	Vanillic.30	184.252	-24.6806	2.02029	-12.2164	2.542e-34	1.76161e-31	***
Soluble	Genus	Catenibacterium	Ferulic.30	Vanillic.300	184.252	-23.8626	2.02075	-11.8088	3.5163e-32	1.8276e-29	***
Soluble	Genus	Christensenellaceae R-7 group	Ferulic.3	Ferulic.30	28.817	5.77355	1.76138	3.27785	0.00104599	0.0334557	*
Soluble	Genus	Christensenellaceae R-7 group	Ferulic.30	Control.0	28.817	-7.47326	1.74578	-4.28076	1.86253e-05	0.00099287	***
Soluble	Genus	Christensenellaceae R-7 group	Ferulic.30	Ferulic.300	28.817	-7.05821	1.74735	-4.03939	5.35903e-05	0.00253214	**
Soluble	Genus	Christensenellaceae R-7 group	Ferulic.30	Vanillic.3	28.817	-8.26827	1.74232	-4.74554	2.07947e-06	0.000131007	***
Soluble	Genus	Christensenellaceae R-7 group	Ferulic.30	Vanillic.30	28.817	-8.16939	1.74263	-4.68797	2.75921e-06	0.000168718	***
Soluble	Genus	Christensenellaceae R-7 group	Ferulic.30	Vanillic.300	28.817	-8.35309	1.7421	-4.79486	1.62792e-06	0.000105764	***
Soluble	Genus	Eggerthella	Ferulic.3	Ferulic.300	31.1842	-35.087	3.4873	-10.0614	8.18496e-24	1.21547e-21	***
Soluble	Genus	Eggerthella	Ferulic.3	Vanillic.3	31.1842	-37.3236	3.48348	-10.7144	8.70876e-27	2.01172e-24	***
Soluble	Genus	Eggerthella	Ferulic.3	Vanillic.30	31.1842	-35.9387	3.48515	-10.312	6.22169e-25	1.07791e-22	***
Soluble	Genus	Eggerthella	Ferulic.3	Vanillic.300	31.1842	-37.0796	3.48367	-10.6439	1.86268e-26	3.8725e-24	***
Soluble	Genus	Eggerthella	Ferulic.30	Ferulic.300	31.1842	-35.659	3.4873	-10.2254	1.52614e-24	2.44064e-22	***
Soluble	Genus	Eggerthella	Ferulic.30	Vanillic.3	31.1842	-37.8955	3.48348	-10.8786	1.45734e-27	4.3283e-25	***
Soluble	Genus	Eggerthella	Ferulic.30	Vanillic.30	31.1842	-36.5107	3.48515	-10.4761	1.11258e-25	2.10277e-23	***
Soluble	Genus	Eggerthella	Ferulic.30	Vanillic.300	31.1842	-37.6516	3.48367	-10.808	3.15336e-27	8.1948e-25	***
Soluble	Genus	Eggerthella	Ferulic.300	Control.0	31.1842	18.198	3.4872	5.2185	1.8038e-07	1.29314e-05	***
Soluble	Genus	Eggerthella	Vanillic.3	Control.0	31.1842	20.4345	3.48338	5.86627	4.4571e-09	3.86097e-07	***
Soluble	Genus	Eggerthella	Vanillic.30	Control.0	31.1842	19.0497	3.48505	5.46611	4.60028e-08	3.41571e-06	***
Soluble	Genus	Eggerthella	Vanillic.300	Control.0	31.1842	20.1906	3.48357	5.79594	6.79396e-09	5.64986e-07	***
Soluble	Genus	Fusicatenibacter	Ferulic.3	Vanillic.30	32.5225	6.25161	1.5518	4.02861	5.61081e-05	0.0025922	**
Soluble	Genus	Fusicatenibacter	Ferulic.30	Vanillic.30	32.5225	7.77942	1.53987	5.05201	4.37174e-07	3.02961e-05	***
Soluble	Genus	Fusicatenibacter	Ferulic.300	Vanillic.30	32.5225	6.40507	1.5491	4.13471	3.5541e-05	0.00184724	**
Soluble	Genus	Fusicatenibacter	Vanillic.3	Vanillic.30	32.5225	6.95917	1.54445	4.50591	6.60876e-06	0.00039256	***
Soluble	Genus	Fusicatenibacter	Vanillic.30	Control.0	32.5225	-9.29011	1.53684	-6.04495	1.49459e-09	1.47965e-07	***
Soluble	Genus	Fusicatenibacter	Vanillic.30	Vanillic.300	32.5225	-7.68909	1.54057	-4.99108	6.00431e-07	4.02676e-05	***
Soluble	Genus	Holdemanella	Ferulic.300	Vanillic.300	21.3772	-4.5274	1.41628	-3.19668	0.00139019	0.0431374	*
Soluble	Genus	Marvinbryantia	Ferulic.3	Ferulic.300	27.8198	8.27411	2.04123	4.05349	5.04584e-05	0.00243961	**
Soluble	Genus	Marvinbryantia	Ferulic.300	Control.0	27.8198	-7.48456	2.04368	-3.66229	0.000249972	0.00999409	**
Soluble	Genus	Marvinbryantia	Ferulic.300	Vanillic.3	27.8198	-7.94944	2.04175	-3.89344	9.8833e-05	0.00437178	**
Soluble	Genus	Marvinbryantia	Ferulic.300	Vanillic.30	27.8198	-8.34282	2.04089	-4.08784	4.35417e-05	0.00220788	**
Soluble	Genus	Odoribacter	Vanillic.3	Vanillic.300	16.4959	-2.13708	0.605681	-3.5284	0.000418087	0.0155215	*
Soluble	Genus	Odoribacter	Vanillic.300	Control.0	16.4959	2.08095	0.609428	3.4146	0.000638752	0.0217699	*
Soluble	Genus	Paeniclostridium	Ferulic.3	Control.0	107.791	-7.01439	1.96447	-3.57062	0.000356138	0.0137113	*
Soluble	Genus	Ruminiclostridium 9	Ferulic.30	Vanillic.3	48.3588	-2.88488	0.811073	-3.55686	0.000375308	0.0141866	*
Soluble	Genus	Streptococcus	Ferulic.3	Control.0	46.9907	-2.79239	0.82736	-3.37507	0.000737976	0.0243532	*
Soluble	Genus	Streptococcus	Vanillic.3	Control.0	46.9907	-3.106	0.830531	-3.73978	0.000184184	0.00765839	**
Insoluble	Phylum	Bacteroidetes	Ferulic.300	Vanillic.300	3286.26	-1.74553	0.451155	-3.86902	0.000109274	0.0114738	*
Insoluble	Class	Bacteroidia	Ferulic.300	Vanillic.300	3286.26	-1.74553	0.451155	-3.86902	0.000109274	0.0183581	*
Insoluble	Order	Bacteroidales	Ferulic.300	Vanillic.300	3278.51	-1.75185	0.451158	-3.88302	0.000103168	0.0259983	*
Insoluble	Family	Bacteroidaceae	Ferulic.300	Vanillic.300	2477.03	-2.06789	0.553513	-3.73594	0.000187015	0.0405824	*
Insoluble	Family	Streptococcaceae	Ferulic.300	Vanillic.300	323.068	-2.86195	0.785812	-3.64203	0.000270501	0.044024	*
Insoluble	Family	Veillonellaceae	Ferulic.3	Vanillic.300	457.413	-6.04153	1.60614	-3.76152	0.000168887	0.0405824	*
Insoluble	Family	Veillonellaceae	Ferulic.30	Vanillic.300	457.413	-6.36216	1.60793	-3.95675	7.59757e-05	0.0405824	*
Insoluble	Genus	[Eubacterium] hallii group	Ferulic.3	Vanillic.300	45.2825	7.98974	2.04622	3.90464	9.43662e-05	0.0116424	*
Insoluble	Genus	[Eubacterium] hallii group	Ferulic.30	Vanillic.300	45.2825	8.71925	2.0452	4.26328	2.01451e-05	0.00795328	**
Insoluble	Genus	[Eubacterium] hallii group	Ferulic.300	Vanillic.300	45.2825	8.23321	2.04609	4.02388	5.72481e-05	0.00927002	**
Insoluble	Genus	[Eubacterium] hallii group	Vanillic.3	Vanillic.300	45.2825	8.49093	2.04588	4.15026	3.32094e-05	0.00819441	**
Insoluble	Genus	[Eubacterium] hallii group	Vanillic.300	Control.0	45.2825	-7.75938	2.04754	-3.78962	0.00015088	0.0175199	*
Insoluble	Genus	Allisonella	Ferulic.3	Vanillic.3	20.9194	-8.67478	2.42113	-3.58295	0.000339736	0.028998	*
Insoluble	Genus	Allisonella	Ferulic.30	Vanillic.3	20.9194	-8.55692	2.42113	-3.53427	0.000408902	0.0310451	*
Insoluble	Genus	Allisonella	Vanillic.3	Vanillic.300	20.9194	8.39163	2.42113	3.466	0.000528267	0.0372429	*
Insoluble	Genus	Anaerostipes	Ferulic.3	Vanillic.30	224.012	4.47924	1.21884	3.67502	0.000237831	0.0236953	*
Insoluble	Genus	Anaerostipes	Ferulic.30	Vanillic.30	224.012	4.43275	1.21888	3.63673	0.000276125	0.0257454	*
Insoluble	Genus	Bacteroides	Ferulic.300	Vanillic.300	2477.03	-2.06789	0.553513	-3.73594	0.000187015	0.0205094	*
Insoluble	Genus	Catenibacterium	Ferulic.3	Ferulic.300	56.6637	-10.4312	2.57272	-4.05453	5.0235e-05	0.00927002	**
Insoluble	Genus	Catenibacterium	Ferulic.3	Vanillic.30	56.6637	-9.45092	2.57334	-3.67262	0.000240073	0.0236953	*
Insoluble	Genus	Catenibacterium	Ferulic.30	Ferulic.300	56.6637	-10.3133	2.57272	-4.00872	6.10488e-05	0.00927002	**
Insoluble	Genus	Catenibacterium	Ferulic.30	Vanillic.30	56.6637	-9.33306	2.57334	-3.62682	0.00028693	0.0257454	*
Insoluble	Genus	Catenibacterium	Ferulic.300	Vanillic.300	56.6637	10.148	2.57272	3.94447	7.99766e-05	0.0112767	*
Insoluble	Genus	Catenibacterium	Vanillic.30	Vanillic.300	56.6637	9.16776	2.57334	3.56259	0.000367216	0.028998	*
Insoluble	Genus	Dorea	Ferulic.3	Control.0	153.97	-3.7572	0.749761	-5.01119	5.4093e-07	0.0010678	**
Insoluble	Genus	Dorea	Ferulic.3	Ferulic.300	153.97	-3.5477	0.749861	-4.73115	2.23255e-06	0.00146902	**
Insoluble	Genus	Dorea	Ferulic.3	Vanillic.3	153.97	-3.62604	0.74994	-4.83511	1.33074e-06	0.00131344	**
Insoluble	Genus	Dorea	Ferulic.30	Control.0	153.97	-3.26145	0.745866	-4.3727	1.22721e-05	0.00605627	**
Insoluble	Genus	Dorea	Ferulic.30	Ferulic.300	153.97	-3.05195	0.745967	-4.09127	4.29018e-05	0.00927002	**
Insoluble	Genus	Dorea	Ferulic.30	Vanillic.3	153.97	-3.13029	0.746046	-4.19584	2.71864e-05	0.00796129	**
Insoluble	Genus	Dorea	Ferulic.300	Vanillic.300	153.97	2.91598	0.746523	3.90609	9.38019e-05	0.0116424	*
Insoluble	Genus	Dorea	Vanillic.3	Vanillic.300	153.97	2.99432	0.746602	4.0106	6.05647e-05	0.00927002	**
Insoluble	Genus	Dorea	Vanillic.300	Control.0	153.97	-3.12548	0.746422	-4.18728	2.82315e-05	0.00796129	**
Insoluble	Genus	Fournierella	Ferulic.300	Vanillic.300	19.0366	7.01139	2.03519	3.44508	0.000570894	0.0382635	*
Insoluble	Genus	Fournierella	Vanillic.3	Vanillic.300	19.0366	7.07042	2.0356	3.47338	0.000513953	0.0372429	*
Insoluble	Genus	Fournierella	Vanillic.30	Vanillic.300	19.0366	6.94951	2.03569	3.41384	0.000640552	0.0407887	*
Insoluble	Genus	Fournierella	Vanillic.300	Control.0	19.0366	-7.00336	2.03581	-3.44009	0.000581513	0.0382635	*
Insoluble	Genus	Streptococcus	Ferulic.300	Vanillic.300	318.79	-2.85168	0.800455	-3.56257	0.000367249	0.028998	*
*group1 and group2 refer to the treatments being compared in each row. Group1 is subtracted from group2. Therefore, a positive log2FoldChange means group2 is higher than group1. The coding for the concentrations is 10-fold higher than what was actually used (for coding purposes). Thus Ferulic.3, referes to ferulic acid at 0.3 mg/g fiber; Vanillic.30 refers to vanillic acid at 3 mg/g fiber, etc.
