# Supplementary material for: Impact of ferulic and vanillic acids on soluble and insoluble dietary fiber utilization from maize bran by the human gut microbiota
Source: Royal Society of Chemistry journal article supplement (doi:10.1039/d5fo00005j), 2025-01-01
Supplement: d5fo00005j4.xlsx [file d5fo00005j4.xlsx]

## Sheet: PC_picrust2_deseq2_sig_rst
Table S4. DESeq2 significant predicted pathways across all treatments for soluble and insoluble fiber
fiber_type	pathway_ID	Class1	Class2	Class3	Class4	pathway	group1	group2	baseMean	log2FoldChange	lfcSE	stat	pvalue	padj	p.adj.signif
Soluble	GLUCARDEG-PWY	Pathways	Degradation/Utilization/Assimilation	Carbohydrate Degradation	Sugar Degradation	D-glucarate degradation I	Ferulic.30	Control.0	950.846	-1.71092	0.394653	-4.33526	1.45585e-05	0.000197579	***
Soluble	GLUCOSE1PMETAB-PWY	Pathways	Degradation/Utilization/Assimilation	Carbohydrate Degradation	Sugar Degradation	glucose and glucose-1-phosphate degradation	Ferulic.30	Control.0	1145.38	-4.62511	1.28229	-3.60691	0.000309862	0.00211576	**
Soluble	HISDEG-PWY	Pathways	Degradation/Utilization/Assimilation	Amine and Polyamine Degradation	Amino Acid Degradation	L-histidine degradation I	Ferulic.30	Control.0	5182.81	1.29049	0.379884	3.39707	0.000681107	0.00431368	**
Soluble	P108-PWY	Pathways	Generation of Metabolites and Energy	Fermentation	SCFA Production	pyruvate fermentation to propanoate I	Ferulic.30	Control.0	10710.9	0.31844	0.11742	2.71199	0.00668813	0.0302558	*
Soluble	P163-PWY	Pathways	Generation of Metabolites and Energy	Fermentation	SCFA Production	L-lysine fermentation to acetate and butanoate	Ferulic.30	Control.0	2094.65	2.60058	0.823025	3.15978	0.00157887	0.00833294	**
Soluble	P221-PWY	Pathways	Degradation/Utilization/Assimilation	Hydrocarbon Degradation	Hydrocarbon Degradation	octane oxidation	Ferulic.30	Control.0	528.569	2.70199	0.749451	3.6053	0.000311796	0.00211576	**
Soluble	P23-PWY	Pathways	Degradation/Utilization/Assimilation	C1 Compound Utilization	CO2 Fixation	reductive TCA cycle I	Ferulic.30	Control.0	3511.11	-2.77497	0.528392	-5.25172	1.50684e-07	7.1575e-06	***
Soluble	P42-PWY	Pathways	Degradation/Utilization/Assimilation	C1 Compound Utilization	CO2 Fixation	incomplete reductive TCA cycle	Ferulic.30	Control.0	15171.7	0.481265	0.11784	4.08405	4.42577e-05	0.000467164	***
Soluble	PWY-5022	Pathways	Generation of Metabolites and Energy	Fermentation	SCFA Production	4-aminobutanoate degradation V	Ferulic.30	Control.0	1329.09	-2.76827	0.543446	-5.09391	3.5075e-07	8.33031e-06	***
Soluble	PWY-5384	Pathways	Degradation/Utilization/Assimilation	Carbohydrate Degradation	Sugar Degradation	sucrose degradation IV (sucrose phosphorylase)	Ferulic.30	Control.0	4809.03	-1.45096	0.44839	-3.23593	0.00121246	0.00708627	**
Soluble	PWY-6507	Pathways	Degradation/Utilization/Assimilation	Secondary Metabolite Degradation	Sugar Derivative Degradation	4-deoxy-L-threo-hex-4-enopyranuronate degradation	Ferulic.30	Control.0	10011	0.965772	0.254781	3.7906	0.000150282	0.00129789	**
Soluble	PWY-6572	Pathways	Degradation/Utilization/Assimilation	Carbohydrate Degradation	Polysaccharide Degradation	chondroitin sulfate degradation I (bacterial)	Ferulic.30	Control.0	4675.59	0.71373	0.268911	2.65415	0.00795092	0.0343335	*
Soluble	PWY-6588	Pathways	Generation of Metabolites and Energy	Fermentation	Ketone Production	pyruvate fermentation to acetone	Ferulic.30	Control.0	4029.09	1.99914	0.651138	3.07022	0.00213899	0.010695	*
Soluble	PWY-6590	Pathways	Generation of Metabolites and Energy	Fermentation	SCFA Production	superpathway of Clostridium acetobutylicum acidogenic fermentation	Ferulic.30	Control.0	2866.03	-2.62955	0.513282	-5.12302	3.00682e-07	8.33031e-06	***
Soluble	PWY-6901	Pathways	Degradation/Utilization/Assimilation	Carbohydrate Degradation	Sugar Degradation	superpathway of glucose and xylose degradation	Ferulic.30	Control.0	9650.6	0.480282	0.124056	3.8715	0.000108166	0.00102757	**
Soluble	PWY-6969	Pathways	Generation of Metabolites and Energy	TCA cycle	NADH Production	TCA cycle V (2-oxoglutarate:ferredoxin oxidoreductase)	Ferulic.30	Control.0	14589.9	0.261981	0.0812821	3.22311	0.00126807	0.00708627	**
Soluble	PWY-7242	Pathways	Degradation/Utilization/Assimilation	Carbohydrate Degradation	Sugar Degradation	D-fructuronate degradation	Ferulic.30	Control.0	12781.1	0.321994	0.115356	2.79131	0.0052496	0.0249356	*
Soluble	PWY-7456	Pathways	Degradation/Utilization/Assimilation	Carbohydrate Degradation	Polysaccharide Degradation	mannan degradation	Ferulic.30	Control.0	4643.02	0.756135	0.202002	3.7432	0.00018169	0.00143838	**
Soluble	PWY0-1533	Pathways	Degradation/Utilization/Assimilation	Inorganic Nutrient Metabolism	Phosphorus Compound Metabolism	methylphosphonate degradation I	Ferulic.30	Control.0	1488.06	-1.40905	0.328529	-4.28897	1.79505e-05	0.000213162	***
Soluble	REDCITCYC	Pathways	Generation of Metabolites and Energy	TCA cycle	NADH Production	TCA cycle VIII (helicobacter)	Ferulic.30	Control.0	1587.95	-4.15278	0.636892	-6.52038	7.01302e-11	6.66237e-09	***
Soluble	SO4ASSIM-PWY	Pathways	Degradation/Utilization/Assimilation	Inorganic Nutrient Metabolism	Sulfur Compound Metabolism	sulfate reduction I (assimilatory)	Ferulic.30	Control.0	1825.94	-2.09701	0.430853	-4.86712	1.13239e-06	1.79295e-05	***
Soluble	SULFATE-CYS-PWY	Pathways	Degradation/Utilization/Assimilation	Inorganic Nutrient Metabolism	Sulfur Compound Metabolism	superpathway of sulfate assimilation and cysteine biosynthesis	Ferulic.30	Control.0	3593.3	-1.88238	0.376515	-4.99949	5.74836e-07	1.09219e-05	***
Soluble	GALACTUROCAT-PWY	Pathways	Degradation/Utilization/Assimilation	Carbohydrate Degradation	Sugar Degradation	D-galacturonate degradation I	Ferulic.300	Control.0	8731.03	0.397505	0.14216	2.79619	0.00517089	0.0190289	*
Soluble	GLYCOLYSIS	Pathways	Generation of Metabolites and Energy	Glycolysis	Pyruvate Production	glycolysis I (from glucose 6-phosphate)	Ferulic.300	Control.0	17131	0.187759	0.0736125	2.55064	0.0107525	0.0353298	*
Soluble	GLYCOLYSIS-E-D	Pathways	Generation of Metabolites and Energy	Glycolysis	Pyruvate Production	superpathway of glycolysis and Entner-Doudoroff	Ferulic.300	Control.0	8523.66	-0.763775	0.257179	-2.96982	0.00297976	0.0119191	*
Soluble	P161-PWY	Pathways	Generation of Metabolites and Energy	Fermentation	Alcohol Production	acetylene degradation	Ferulic.300	Control.0	13028.2	-0.55254	0.172088	-3.21081	0.00132363	0.00608872	**
Soluble	P164-PWY	Pathways	Degradation/Utilization/Assimilation	Nucleoside and Nucleotide Degradation	Purine Nucleotide Degradation	purine nucleobases degradation I (anaerobic)	Ferulic.300	Control.0	7076.1	-0.791855	0.238791	-3.31611	0.000912815	0.00490036	**
Soluble	P441-PWY	Pathways	Degradation/Utilization/Assimilation	Carbohydrate Degradation	Sugar Degradation	superpathway of N-acetylneuraminate degradation	Ferulic.300	Control.0	10652.2	-0.530499	0.191092	-2.77614	0.00550081	0.0194644	*
Soluble	PENTOSE-P-PWY	Pathways	Generation of Metabolites and Energy	Pentose Phosphate Pathways	C4, C5, and C7 Sugar Production	pentose phosphate pathway	Ferulic.300	Control.0	8651.14	0.372216	0.139334	2.67139	0.00755374	0.0257387	*
Soluble	PWY-5484	Pathways	Generation of Metabolites and Energy	Glycolysis	Pyruvate Production	glycolysis II (from fructose 6-phosphate)	Ferulic.300	Control.0	13749.6	0.249879	0.0876107	2.85215	0.00434242	0.016646	*
Soluble	PWY-7003	Pathways	Generation of Metabolites and Energy	Fermentation	Alcohol Production	glycerol degradation to butanol	Ferulic.300	Control.0	4391.17	0.626058	0.25543	2.45099	0.0142463	0.0430171	*
Soluble	PWY-7111	Pathways	Generation of Metabolites and Energy	Fermentation	Alcohol Production	pyruvate fermentation to isobutanol (engineered)	Ferulic.300	Control.0	27016.9	-0.134627	0.0550675	-2.44476	0.0144949	0.0430171	*
Soluble	PWY0-1297	Pathways	Degradation/Utilization/Assimilation	Nucleoside and Nucleotide Degradation	Purine Nucleotide Degradation	superpathway of purine deoxyribonucleosides degradation	Ferulic.300	Control.0	12461.8	-0.348596	0.110171	-3.16413	0.00155547	0.00681442	**
Soluble	PWY0-1298	Pathways	Degradation/Utilization/Assimilation	Nucleoside and Nucleotide Degradation	Pyrimidine Nucleotide Degradation	superpathway of pyrimidine deoxyribonucleosides degradation	Ferulic.300	Control.0	12961.1	-0.33118	0.102724	-3.22396	0.00126429	0.00608872	**
Soluble	PWY-4984	Pathways	Degradation/Utilization/Assimilation	Inorganic Nutrient Metabolism	Nitrogen Compound Metabolism	urea cycle	Ferulic.30	Ferulic.3	2868.34	0.929291	0.323826	2.86972	0.00410835	0.0457054	*
Soluble	PWY490-3	Pathways	Degradation/Utilization/Assimilation	Inorganic Nutrient Metabolism	Nitrogen Compound Metabolism	nitrate reduction VI (assimilatory)	Ferulic.30	Ferulic.3	3447.42	1.58136	0.588733	2.68604	0.00723049	0.049501	*
Soluble	GLUCUROCAT-PWY	Pathways	Degradation/Utilization/Assimilation	Carbohydrate Degradation	Sugar Degradation	superpathway of beta-D-glucuronide and D-glucuronate degradation	Ferulic.300	Ferulic.3	8486.29	-0.381094	0.139716	-2.72764	0.00637897	0.0493453	*
Soluble	KETOGLUCONMET-PWY	Pathways	Degradation/Utilization/Assimilation	Carbohydrate Degradation	Sugar Degradation	ketogluconate metabolism	Vanillic.3	Ferulic.30	22.673	8.23078	2.72865	3.01643	0.00255769	0.0115705	*
Soluble	P122-PWY	Pathways	Generation of Metabolites and Energy	Fermentation	SCFA Production	heterolactic fermentation	Vanillic.3	Ferulic.30	1205.05	2.31107	0.66057	3.4986	0.000467707	0.00305174	**
Soluble	P124-PWY	Pathways	Generation of Metabolites and Energy	Fermentation	SCFA Production	Bifidobacterium shunt	Vanillic.3	Ferulic.30	1455.56	2.39989	0.669623	3.58394	0.000338451	0.0026794	**
Soluble	PWY-5304	Pathways	Degradation/Utilization/Assimilation	Inorganic Nutrient Metabolism	Sulfur Compound Metabolism	superpathway of sulfur oxidation (Acidianus ambivalens)	Vanillic.3	Ferulic.30	2329.55	0.702341	0.259066	2.71105	0.00670698	0.0229303	*
Soluble	PWY-5677	Pathways	Generation of Metabolites and Energy	Fermentation	SCFA Production	succinate fermentation to butanoate	Vanillic.3	Ferulic.30	658.433	1.02308	0.397013	2.57695	0.00996757	0.0305458	*
Soluble	PWY-5695	Pathways	Degradation/Utilization/Assimilation	Nucleoside and Nucleotide Degradation	Purine Nucleotide Degradation	urate biosynthesis/inosine 5'-phosphate degradation	Vanillic.3	Ferulic.30	15144.4	-0.191998	0.0644357	-2.97968	0.0028855	0.0124601	*
Soluble	PWY-6353	Pathways	Degradation/Utilization/Assimilation	Nucleoside and Nucleotide Degradation	Purine Nucleotide Degradation	purine nucleotides degradation II (aerobic)	Vanillic.3	Ferulic.30	7677.01	0.433289	0.158025	2.7419	0.00610845	0.0229303	*
Soluble	PWY-6641	Pathways	Degradation/Utilization/Assimilation	Inorganic Nutrient Metabolism	Sulfur Compound Metabolism	superpathway of sulfolactate degradation	Vanillic.3	Ferulic.30	51.5634	3.61645	1.33521	2.70852	0.00675841	0.0229303	*
Soluble	RHAMCAT-PWY	Pathways	Degradation/Utilization/Assimilation	Carbohydrate Degradation	Sugar Degradation	L-rhamnose degradation I	Vanillic.3	Ferulic.30	9797.73	-0.518998	0.146044	-3.55371	0.000379842	0.00277577	**
Soluble	SALVADEHYPOX-PWY	Pathways	Degradation/Utilization/Assimilation	Nucleoside and Nucleotide Degradation	Purine Nucleotide Degradation	adenosine nucleotides degradation II	Vanillic.3	Ferulic.30	5325.51	0.636284	0.232813	2.73302	0.00627566	0.0229303	*
Soluble	PWY-7237	Pathways	Degradation/Utilization/Assimilation	Secondary Metabolite Degradation	Sugar Derivative Degradation	myo-, chiro- and scillo-inositol degradation	Vanillic.30	Ferulic.300	2142.95	-0.978212	0.384011	-2.54736	0.0108543	0.0321751	*
Insoluble	KETOGLUCONMET-PWY	Pathways	Degradation/Utilization/Assimilation	Carbohydrate Degradation	Sugar Degradation	ketogluconate metabolism	Ferulic.3	Control.0	33.136	-19.4469	3.41169	-5.70008	1.19749e-08	1.66452e-06	***
Insoluble	P221-PWY	Pathways	Degradation/Utilization/Assimilation	Hydrocarbon Degradation	Hydrocarbon Degradation	octane oxidation	Ferulic.3	Control.0	1122.61	4.35051	1.11434	3.9041	9.45759e-05	0.00657303	**
Insoluble	PWY-3781	Pathways	Generation of Metabolites and Energy	Respiration	Aerobic Respiration	aerobic respiration I (cytochrome c)	Ferulic.3	Control.0	24.1495	19.0873	5.52698	3.45348	0.000553404	0.0223462	*
Insoluble	PWY-5304	Pathways	Degradation/Utilization/Assimilation	Inorganic Nutrient Metabolism	Sulfur Compound Metabolism	superpathway of sulfur oxidation (Acidianus ambivalens)	Ferulic.3	Control.0	1828.48	2.45963	0.720713	3.41277	0.000643056	0.0223462	*
Insoluble	GLUCARDEG-PWY	Pathways	Degradation/Utilization/Assimilation	Carbohydrate Degradation	Sugar Degradation	D-glucarate degradation I	Ferulic.30	Control.0	2066.7	-2.30612	0.796647	-2.89478	0.0037942	0.037671	*
Insoluble	PWY-5180	Pathways	Degradation/Utilization/Assimilation	Aromatic Compound Degradation	Aromatic Compound Degradation	toluene degradation I (aerobic) (via o-cresol)	Ferulic.30	Control.0	110.448	19.8403	3.85966	5.14044	2.74103e-07	9.52507e-06	***
Insoluble	PWY-5182	Pathways	Degradation/Utilization/Assimilation	Aromatic Compound Degradation	Aromatic Compound Degradation	toluene degradation II (aerobic) (via 4-methylcatechol)	Ferulic.30	Control.0	110.448	19.8403	3.85966	5.14044	2.74103e-07	9.52507e-06	***
Insoluble	PWY-5415	Pathways	Degradation/Utilization/Assimilation	Aromatic Compound Degradation	Phenolic Compound Degradation	catechol degradation I (meta-cleavage pathway)	Ferulic.30	Control.0	23.832	15.5556	3.18963	4.87693	1.07751e-06	2.99548e-05	***
Insoluble	PWY-5747	Pathways	Degradation/Utilization/Assimilation	Carboxylate Degradation	Propanoate Degradation	2-methylcitrate cycle II	Ferulic.30	Control.0	25.3755	16.2239	2.83694	5.7188	1.07276e-08	1.49114e-06	***
Insoluble	PWY-7456	Pathways	Degradation/Utilization/Assimilation	Carbohydrate Degradation	Polysaccharide Degradation	mannan degradation	Ferulic.30	Control.0	4188.22	0.634439	0.224842	2.8217	0.00477693	0.0442662	*
Insoluble	PWY0-1277	Pathways	Degradation/Utilization/Assimilation	Aromatic Compound Degradation	Phenolic Compound Degradation	3-phenylpropanoate and 3-(3-hydroxyphenyl)propanoate degradation	Ferulic.30	Control.0	26.0252	15.6858	3.34456	4.68993	2.73304e-06	6.14245e-05	***
Insoluble	PWY0-321	Pathways	Degradation/Utilization/Assimilation	Aromatic Compound Degradation	Phenolic Compound Degradation	phenylacetate degradation I (aerobic)	Ferulic.30	Control.0	25.1535	15.5871	3.34162	4.66452	3.09332e-06	6.14245e-05	***
Insoluble	PWY0-42	Pathways	Degradation/Utilization/Assimilation	Carboxylate Degradation	Propanoate Degradation	2-methylcitrate cycle I	Ferulic.30	Control.0	21.5198	14.6982	3.20544	4.58539	4.5315e-06	7.87348e-05	***
Insoluble	SO4ASSIM-PWY	Pathways	Degradation/Utilization/Assimilation	Inorganic Nutrient Metabolism	Sulfur Compound Metabolism	sulfate reduction I (assimilatory)	Ferulic.30	Control.0	3615.4	-1.05455	0.319371	-3.30196	0.000960131	0.0121326	*
Insoluble	SULFATE-CYS-PWY	Pathways	Degradation/Utilization/Assimilation	Inorganic Nutrient Metabolism	Sulfur Compound Metabolism	superpathway of sulfate assimilation and cysteine biosynthesis	Ferulic.30	Control.0	6212.63	-0.813796	0.268385	-3.0322	0.00242778	0.0259586	*
Insoluble	3-HYDROXYPHENYLACETATE-DEGRADATION-PWY	Pathways	Degradation/Utilization/Assimilation	Aromatic Compound Degradation	Phenolic Compound Degradation	4-hydroxyphenylacetate degradation	Ferulic.300	Control.0	20.8101	20.284	3.35696	6.04238	1.51853e-09	3.29014e-08	***
Insoluble	PWY-6071	Pathways	Degradation/Utilization/Assimilation	Aromatic Compound Degradation	Phenolic Compound Degradation	superpathway of phenylethylamine degradation	Ferulic.300	Control.0	21.0231	20.7391	3.55856	5.82793	5.61197e-09	1.04222e-07	***
Insoluble	PWY-6876	Pathways	Generation of Metabolites and Energy	Fermentation	Alcohol Production	isopropanol biosynthesis	Ferulic.300	Control.0	16.4487	-6.41627	2.11686	-3.03103	0.00243719	0.0288032	*
Insoluble	HISDEG-PWY	Pathways	Degradation/Utilization/Assimilation	Amine and Polyamine Degradation	Amino Acid Degradation	L-histidine degradation I	Vanillic.300	Control.0	5586.87	1.26117	0.402454	3.13369	0.00172624	0.0172624	*
Insoluble	P42-PWY	Pathways	Degradation/Utilization/Assimilation	C1 Compound Utilization	CO2 Fixation	incomplete reductive TCA cycle	Vanillic.300	Control.0	16192.9	0.899864	0.25598	3.51536	0.000439151	0.00526981	**
Insoluble	PWY-6507	Pathways	Degradation/Utilization/Assimilation	Secondary Metabolite Degradation	Sugar Derivative Degradation	4-deoxy-L-threo-hex-4-enopyranuronate degradation	Vanillic.300	Control.0	8045.27	0.971321	0.258434	3.75848	0.000170949	0.00293055	**
Insoluble	PWY-6901	Pathways	Degradation/Utilization/Assimilation	Carbohydrate Degradation	Sugar Degradation	superpathway of glucose and xylose degradation	Vanillic.300	Control.0	8806.91	0.871467	0.246001	3.54253	0.000396312	0.00526981	**
Insoluble	PWY-6969	Pathways	Generation of Metabolites and Energy	TCA cycle	NADH Production	TCA cycle V (2-oxoglutarate:ferredoxin oxidoreductase)	Vanillic.300	Control.0	13895.5	0.550271	0.181515	3.03155	0.00243305	0.0216384	*
Insoluble	PWY490-3	Pathways	Degradation/Utilization/Assimilation	Inorganic Nutrient Metabolism	Nitrogen Compound Metabolism	nitrate reduction VI (assimilatory)	Vanillic.300	Control.0	4218.24	1.54024	0.509946	3.02039	0.00252448	0.0216384	*
Insoluble	PWY-6317	Pathways	Degradation/Utilization/Assimilation	Carbohydrate Degradation	Sugar Degradation	galactose degradation I (Leloir pathway)	Ferulic.300	Ferulic.3	16935.2	-0.544897	0.175718	-3.10097	0.00192886	0.016757	*
Insoluble	SALVADEHYPOX-PWY	Pathways	Degradation/Utilization/Assimilation	Nucleoside and Nucleotide Degradation	Purine Nucleotide Degradation	adenosine nucleotides degradation II	Ferulic.300	Ferulic.3	4908.51	1.07637	0.393362	2.73633	0.00621288	0.0474523	*
Insoluble	THREOCAT-PWY	Pathways	Degradation/Utilization/Assimilation	Amine and Polyamine Degradation	Amino Acid Degradation	superpathway of L-threonine metabolism	Ferulic.300	Ferulic.3	88.5223	5.79528	1.76588	3.28181	0.00103144	0.009558	**
Insoluble	LACTOSECAT-PWY	Pathways	Degradation/Utilization/Assimilation	Carbohydrate Degradation	Sugar Degradation	lactose and galactose degradation I	Vanillic.3	Ferulic.3	745.334	-3.88922	1.19864	-3.24469	0.00117579	0.0108957	*
Insoluble	GLUCOSE1PMETAB-PWY	Pathways	Degradation/Utilization/Assimilation	Carbohydrate Degradation	Sugar Degradation	glucose and glucose-1-phosphate degradation	Ferulic.300	Ferulic.30	2531.85	3.26272	1.16232	2.80707	0.00499946	0.0496375	*
Insoluble	P108-PWY	Pathways	Generation of Metabolites and Energy	Fermentation	SCFA Production	pyruvate fermentation to propanoate I	Vanillic.300	Ferulic.300	11655.3	1.18436	0.365801	3.23773	0.00120486	0.011165	*
Insoluble	PWY-4984	Pathways	Degradation/Utilization/Assimilation	Inorganic Nutrient Metabolism	Nitrogen Compound Metabolism	urea cycle	Vanillic.300	Ferulic.300	3510.71	1.81374	0.547035	3.31558	0.000914542	0.0104221	*
Insoluble	PWY-7431	Pathways	Degradation/Utilization/Assimilation	Amine and Polyamine Degradation	Biogenic Amine Degradation	aromatic biogenic amine degradation (bacteria)	Vanillic.300	Ferulic.300	123.052	-5.25322	1.60313	-3.27685	0.00104971	0.0104221	*
Insoluble	RHAMCAT-PWY	Pathways	Degradation/Utilization/Assimilation	Carbohydrate Degradation	Sugar Degradation	L-rhamnose degradation I	Vanillic.300	Ferulic.300	8114.42	0.597354	0.18226	3.27748	0.00104737	0.0104221	*
Insoluble	TCA	Pathways	Generation of Metabolites and Energy	TCA cycle	NADH Production	TCA cycle I (prokaryotic)	Vanillic.300	Ferulic.300	12426.3	0.644224	0.205444	3.13577	0.00171405	0.0148908	*
*group1 and group2 refer to the treatments being compared in each row. Group1 is subtracted from group2. Therefore, a positive log2FoldChange means group2 is higher than group1. The coding for the concentrations is 10-fold higher than what was actually used (for coding purposes). Thus Ferulic.3, referes to ferulic acid at 0.3 mg/g fiber; Vanillic.30 refers to vanillic acid at 3 mg/g fiber, etc.
